# Supplementary material
Source: PubMed Central journal article supplement (PMC6920571)
Supplement: NIHMS1543520-supplement-1.pdf [file NIHMS1543520-supplement-1.pdf]

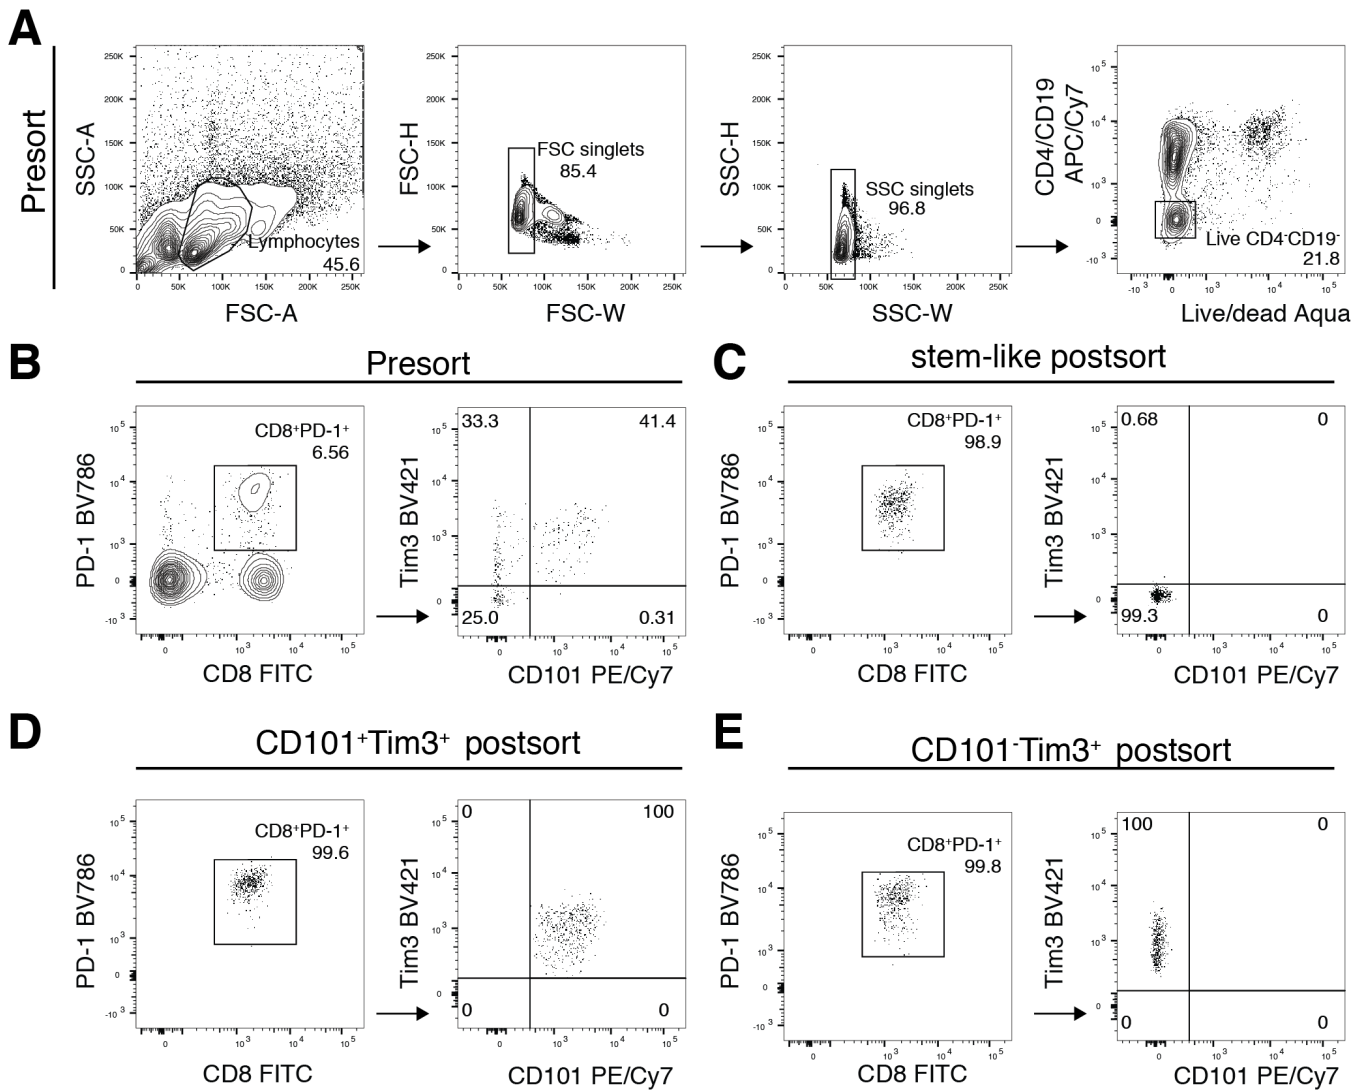

**Figure S1, related to main Figure 3: Gating strategy for sorting of CD101 and Tim3 subsets for RNA-sequencing at day 15 and 45 post-infection.** A) Gating strategy for isolation of CD4<sup>+</sup>CD19<sup>-</sup> lymphocytes. A representative presort sample is shown. B) Presort frequencies of PD-1<sup>+</sup>CD8<sup>+</sup>CD4<sup>+</sup>CD19<sup>-</sup> lymphocytes and expression of CD101 and Tim3 on PD-1<sup>+</sup>CD8<sup>+</sup> cells. C-E) Postsort frequencies and Tim3/CD101 expression of CD101<sup>-</sup>Tim3<sup>-</sup> cells (C), CD101<sup>-</sup>Tim3<sup>+</sup> cells (E), and CD101<sup>+</sup>Tim3<sup>+</sup> cells (D). The same representative sample is shown after cell sorting.

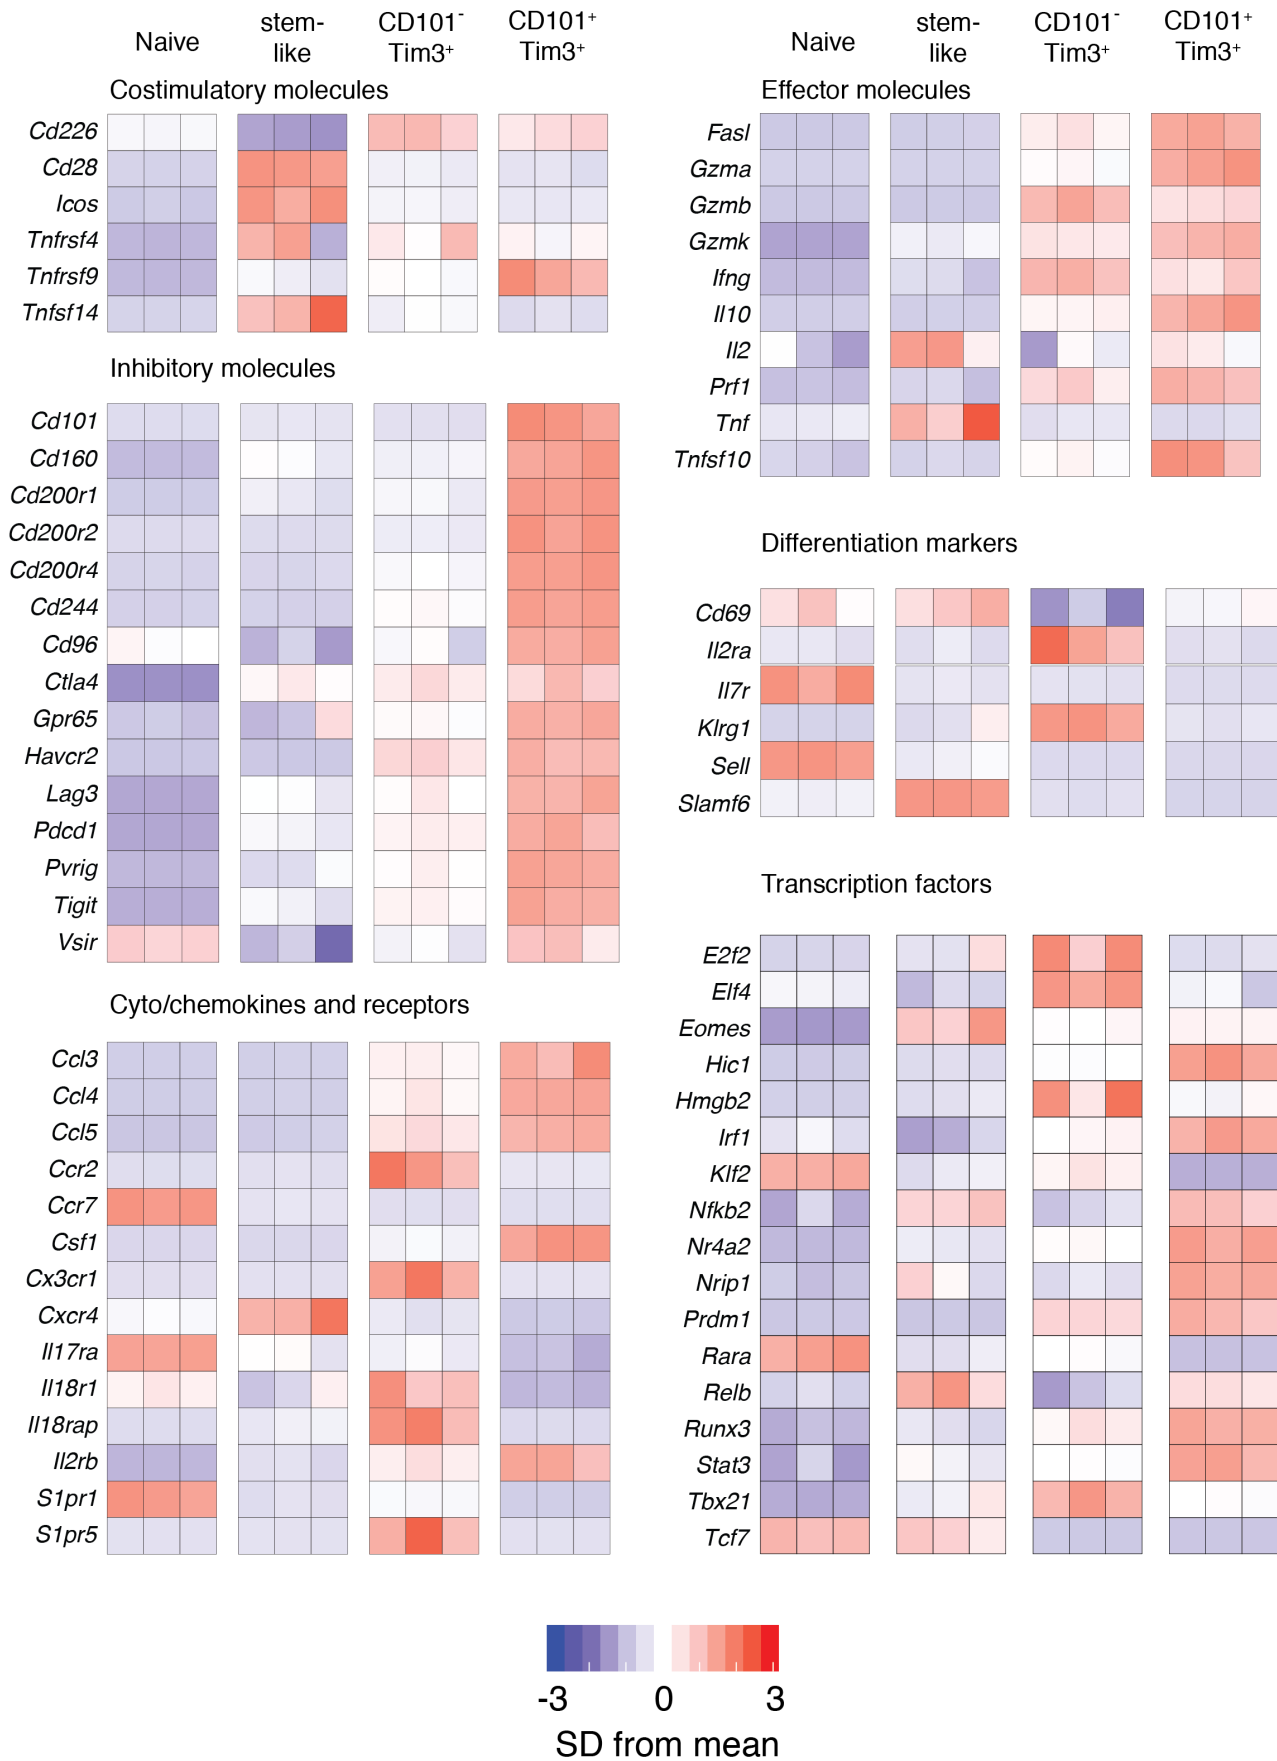

**Figure S2, related to main Figure 3: Relative expression of selected genes in stem-like, transitory CD101<sup>-</sup> Tim3<sup>+</sup> cells, and exhausted CD101<sup>+</sup> Tim3<sup>+</sup> cells at day 45 post-infection.** Expression shown is standard deviation from mean (z-score) for all samples sequenced; absolute expression is shown in Table S2.

**A**CD101<sup>-</sup>Tim3<sup>-</sup> vs CD101<sup>-</sup>Tim3<sup>+</sup> cells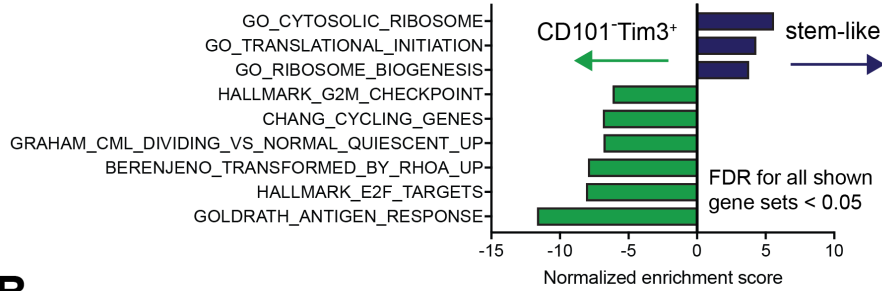**B**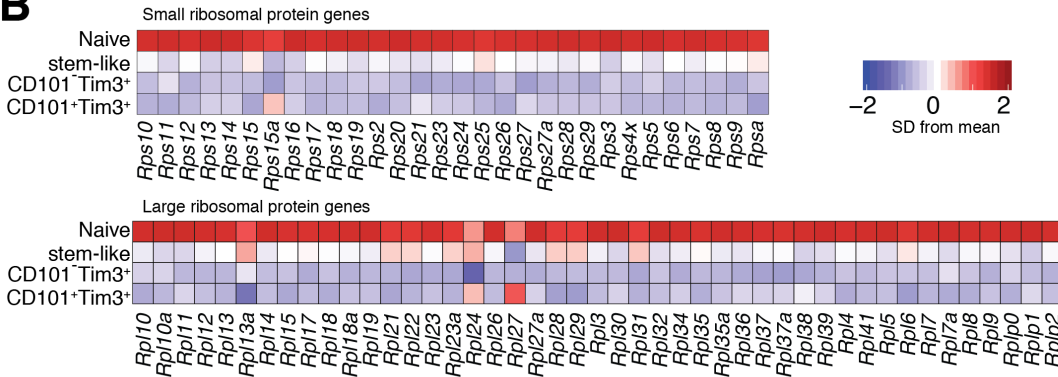**C**CD101<sup>-</sup>Tim3<sup>+</sup> vs CD101<sup>+</sup>Tim3<sup>+</sup> cells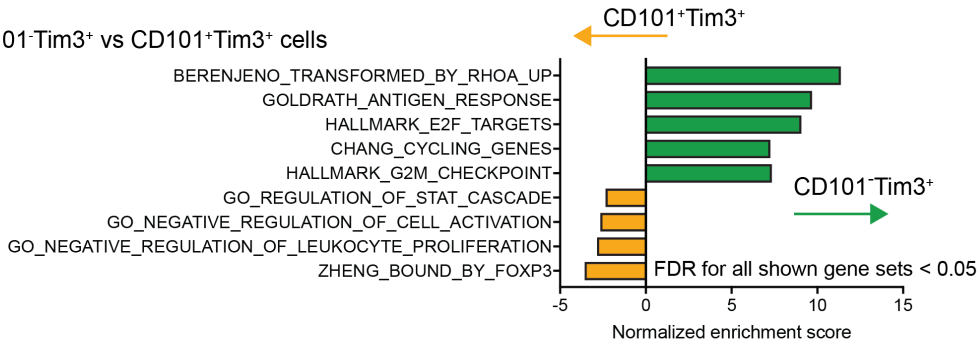**D**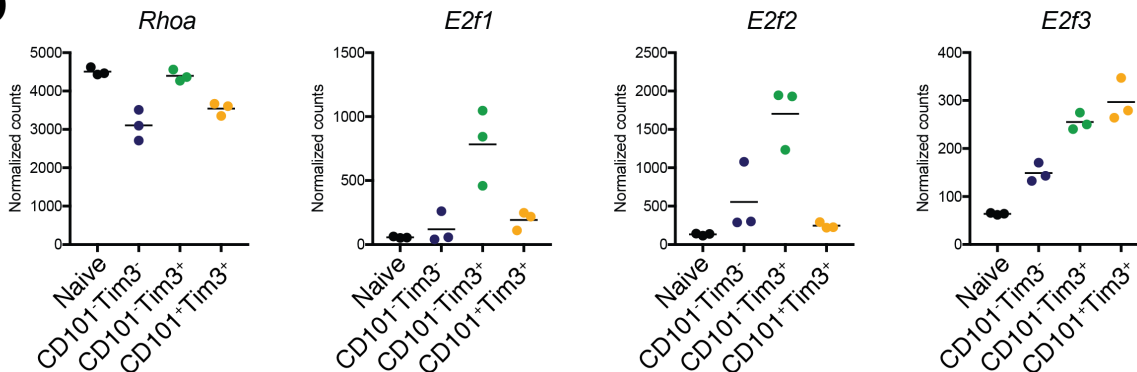

**Figure S3, related to main Figure 3: GSEA reveals divergent transcriptional pathways among stem-like, CD101<sup>-</sup>Tim3<sup>+</sup>, and CD101<sup>+</sup>Tim3<sup>+</sup> CD8<sup>+</sup> T cells from chronic infection.** A) Selected gene sets enriched in stem-like cells when compared to CD101<sup>-</sup>Tim3<sup>+</sup> cells. Ribosomal gene sets were notably enriched in stem-like cells. B) Relative expression of small and large ribosomal subunit genes among all cell types sequenced. C) Selected enriched gene sets when comparing CD101<sup>-</sup>Tim3<sup>+</sup> CD8<sup>+</sup> T cells to CD101<sup>+</sup>Tim3<sup>+</sup> cells. Proliferative gene sets were enriched in CD101<sup>-</sup>Tim3<sup>+</sup> cells, including genes regulated by RhoA and E2F. D) Expression of *Rhoa* and E2F-family genes in CD8<sup>+</sup> T cell subsets in chronic infection. Complete GSEA results from day 45 post-infection are shown in **Table S3**.

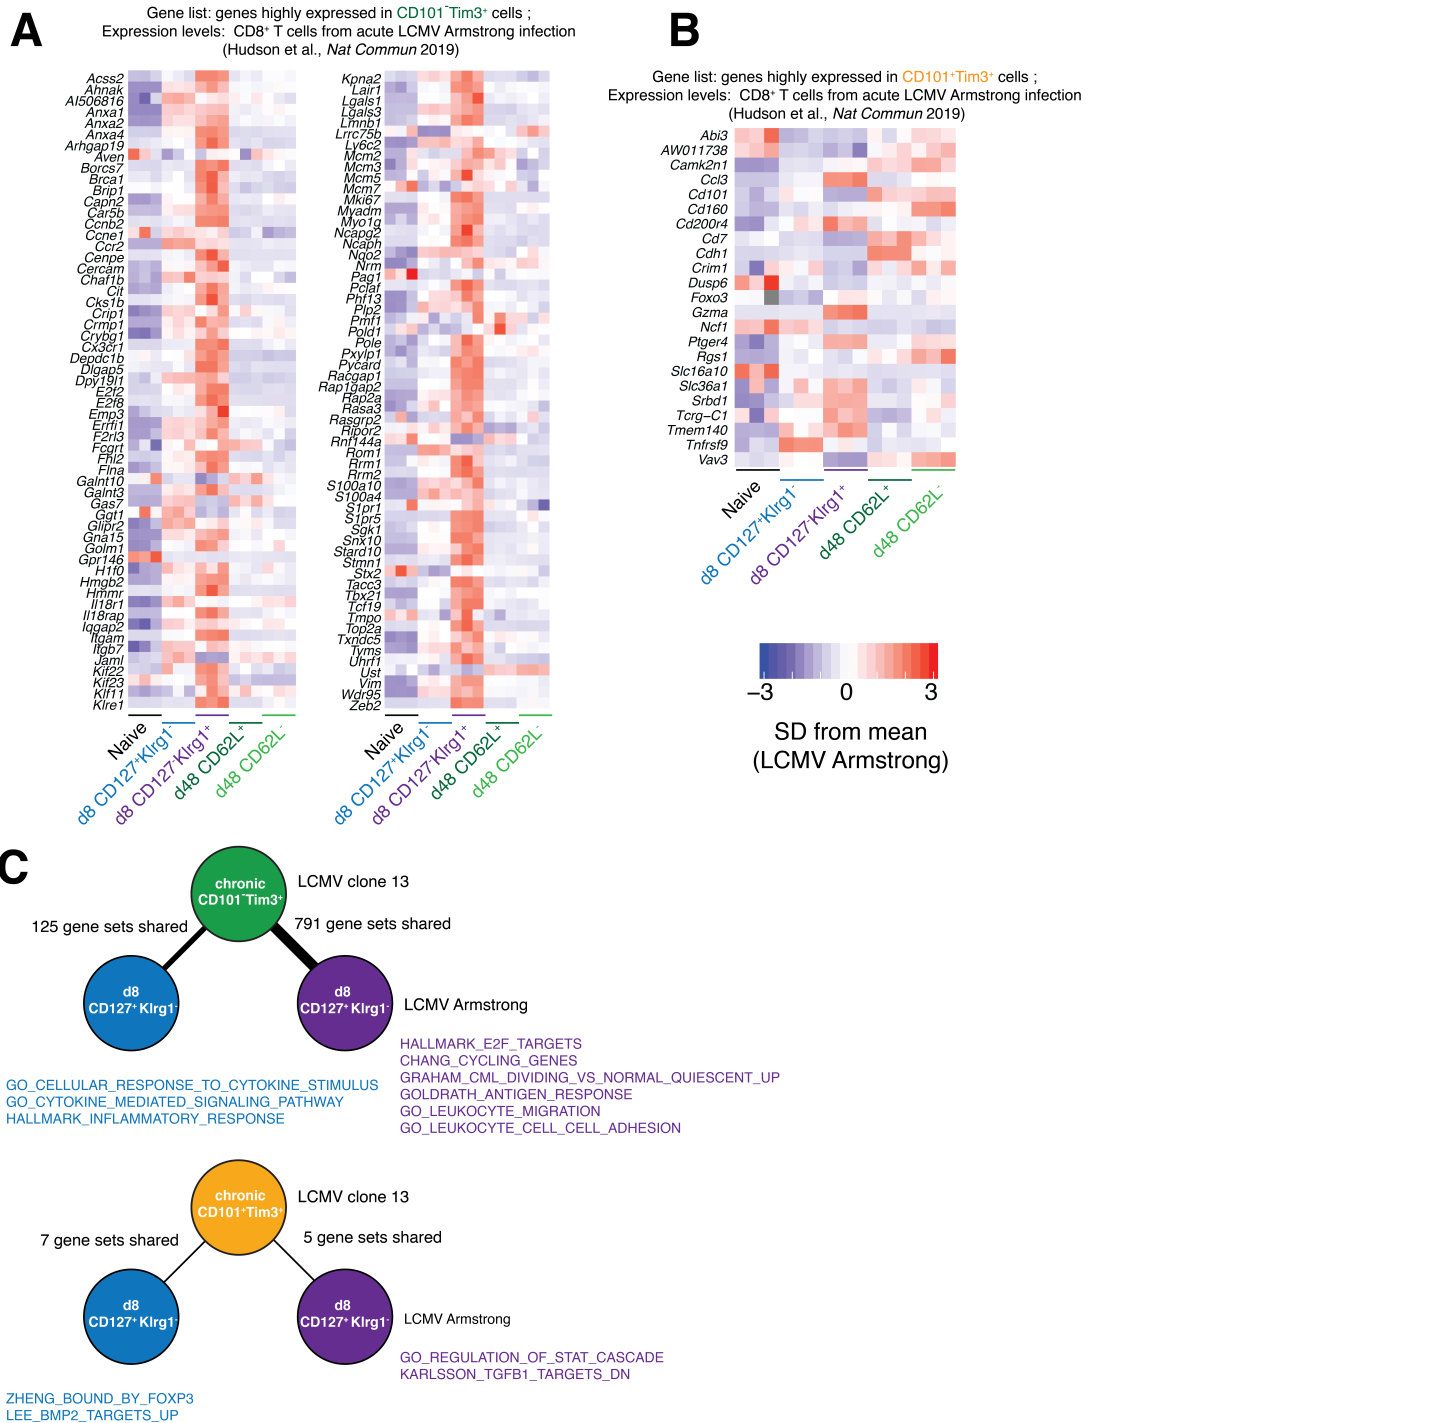

**Figure S4, related to main Figure 3: CD101<sup>hi</sup>Tim3<sup>+</sup> cells from chronic LCMV infection express genes similar to Klrp1<sup>hi</sup> effectors from acute LCMV Armstrong infection.**

A) Heatmap of genes expressed predominately in CD101<sup>hi</sup>Tim3<sup>+</sup> CD8<sup>+</sup> T cells during chronic infection (day >45). Color indicates relative expression of each gene in LCMV-specific CD8<sup>+</sup> T cells isolated after LCMV Armstrong infection(Hudson et al., 2019). B) Heatmap of genes expressed predominately in CD101<sup>+</sup>Tim3<sup>+</sup> during chronic infection (day >45). C) Number of gene sets shared between those enriched in CD101<sup>+</sup>Tim3<sup>+</sup> cells (versus CD101<sup>hi</sup>Tim3<sup>+</sup> cells) and those enriched in day 8 CD127<sup>hi</sup> (left) or Klrp1<sup>hi</sup> (right) cells. Sample gene set names are shown. In parts (A) and (B), genes were selected by being highly differentially expressed ( $\geq 2$ -fold and  $p < 0.05$ ) in the indicated subset versus both other subsets from chronic infection.

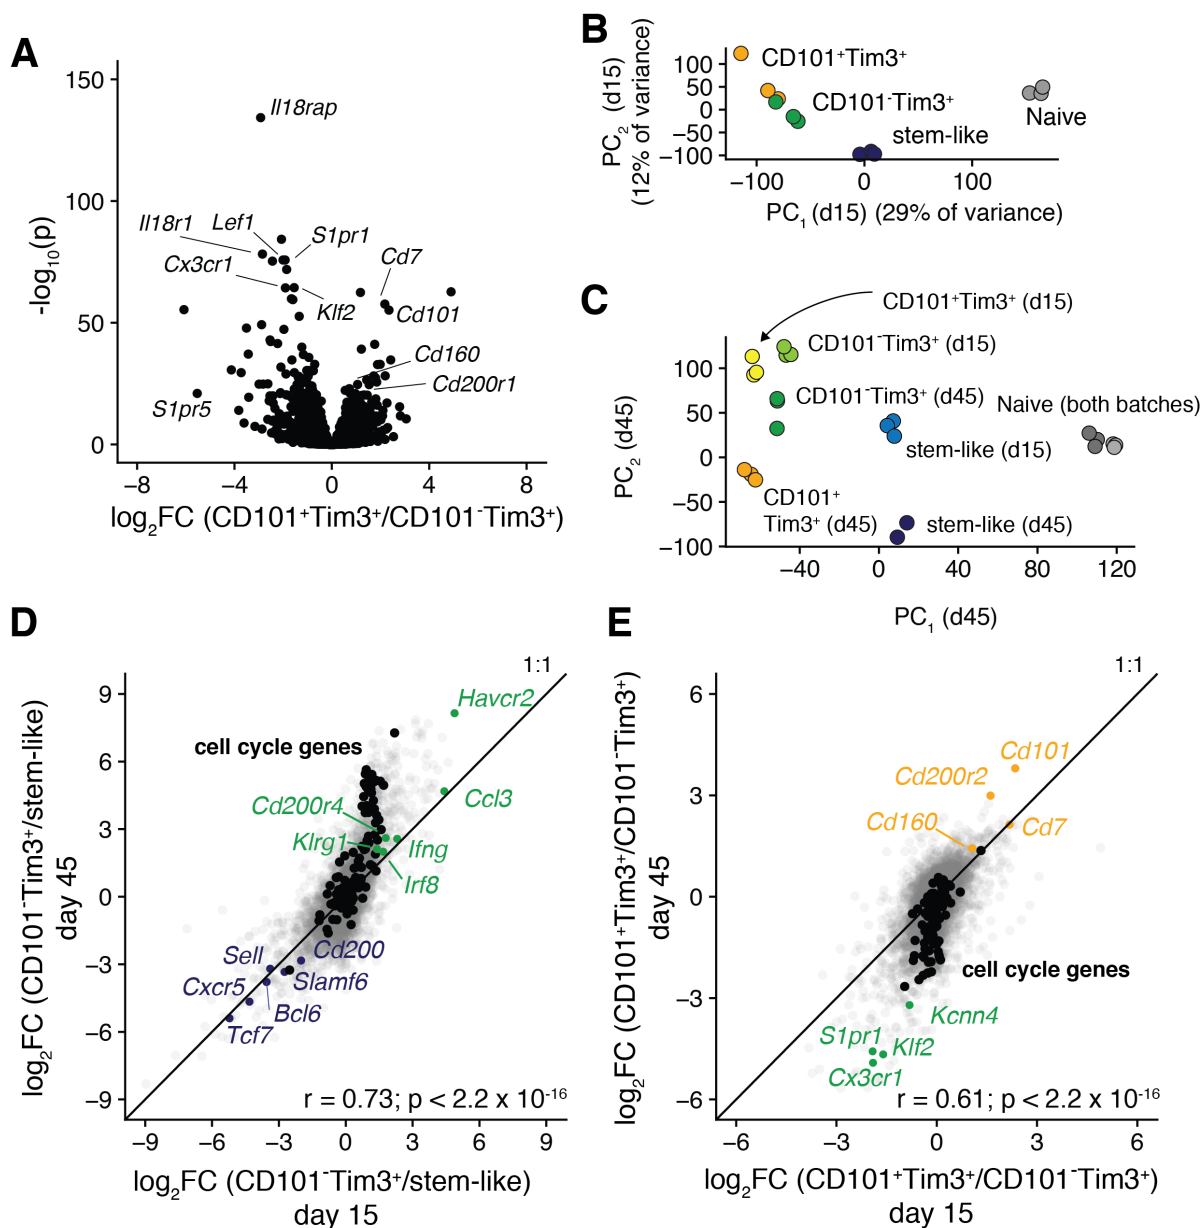

**Figure S5, related to main Figure 3: Stem-like, CD101<sup>-</sup>Tim3<sup>+</sup>, and CD101<sup>+</sup>Tim3<sup>+</sup> CD8<sup>+</sup> T cells express similar transcriptional profiles at day 15 and day 45.** RNA was isolated and sequenced from PD-1<sup>+</sup>CD8<sup>+</sup> T cells of LCMV clone 13-infected mice (day 15). See **Figure S1** for gating strategy. A) Volcano plot showing differential gene expression between CD101<sup>+</sup>Tim3<sup>+</sup> and CD101<sup>-</sup>Tim3<sup>+</sup> cells; 1,994 genes were differentially expressed between these two subsets at day 15 post-infection. B) PCA performed on day 15 RNA-sequencing data shows similar clustering of stem-like, CD101<sup>+</sup>Tim3<sup>+</sup> and CD101<sup>-</sup>Tim3<sup>+</sup> cells as at day 45 (compare with **Figure 3B**). C) Day 15 samples were projected onto principal components from day 45 RNA-sequencing data (see **Figure 3B**). D) Plot showing fold changes of individual genes between CD101<sup>-</sup>Tim3<sup>+</sup> cells and stem-like cells at day 45 (y-axis) and between the same subsets day 15 (x-axis). Differential expression of genes between these two subsets was very similar (Pearson's  $r = 0.73$ ) at both time points. Notably, cell division associated genes are largely similar at day 15 but not day 45. However, expression of lineage-defining stem-like cell genes such as *Tcf7* (encoding Tcf-1) are firmly etched by day 15 post-infection. E) Plot showing fold changes of individual genes between CD101<sup>+</sup>Tim3<sup>+</sup> cells and CD101<sup>-</sup>Tim3<sup>+</sup> cells at day 45 (y-axis) and day 15 (x-axis). Differential expression of genes between these two subsets was also very similar (Pearson's  $r = 0.61$ ) at both time points. Notably, cell division associated genes are largely similar at day 15 but not day 45. In panels D and E, cell cycle genes are from the "MITOTIC\_CELL\_CYCLE" gene set (<http://amigo.geneontology.org/amigo/term/GO:0000278>).
